# Supplementary material
Source: Research Square preprint supplement (doi:10.21203/rs.3.rs-9863043/v1)
Supplement: Supplementary file 1 [file d0722a55f8b923db43ff838f.docx]

1. Did you take any antiviral medications during that time? (Which ones, specifically?)
2. When did you first experience symptoms of ascites, hepatic encephalopathy, or upper gastrointestinal bleeding?
3. Did you stop drinking during that time? If so, for how long?
4. What is the measured HBV DNA level in the blood following treatment with antiviral drugs or other medications (is it <20)?
5. How long has it been since the symptoms of ascites, hepatic encephalopathy, and upper gastrointestinal bleeding disappeared? Has it been more than 12 months?
6. Have your recent medical checkup results been normal? Which ones were abnormal?
7. Did the patient die from cirrhosis? When did this occur? Did the condition progress to liver cancer? When did this occur?
8. Have any more severe symptoms developed since then, such as a diagnosis of refractory ascites, hepatorenal syndrome, or spontaneous peritonitis? When did these symptoms appear? How long did they last?
